# Supplementary material for: Investigating the effect of supramolecular gel phase crystallization on gel nucleation
Source: Royal Society of Chemistry journal article supplement (doi:10.1039/c8sm01916a), 2018-01-01
Supplement: c8sm01916a1.pdf [file c8sm01916a1.pdf]

Supporting Information for

**Investigating the effect of supramolecular gel phase crystallization on gel nucleation**

Arnab Dawn,<sup>a ‡</sup> Marzieh Mirzamani,<sup>a ‡</sup> Christopher D. Jones,<sup>b</sup> Dmitry S. Yufit,<sup>b</sup> Shou Qian,<sup>c</sup> Jonathan W. Steed<sup>\*b</sup> and Harshita Kumari<sup>\*a</sup>

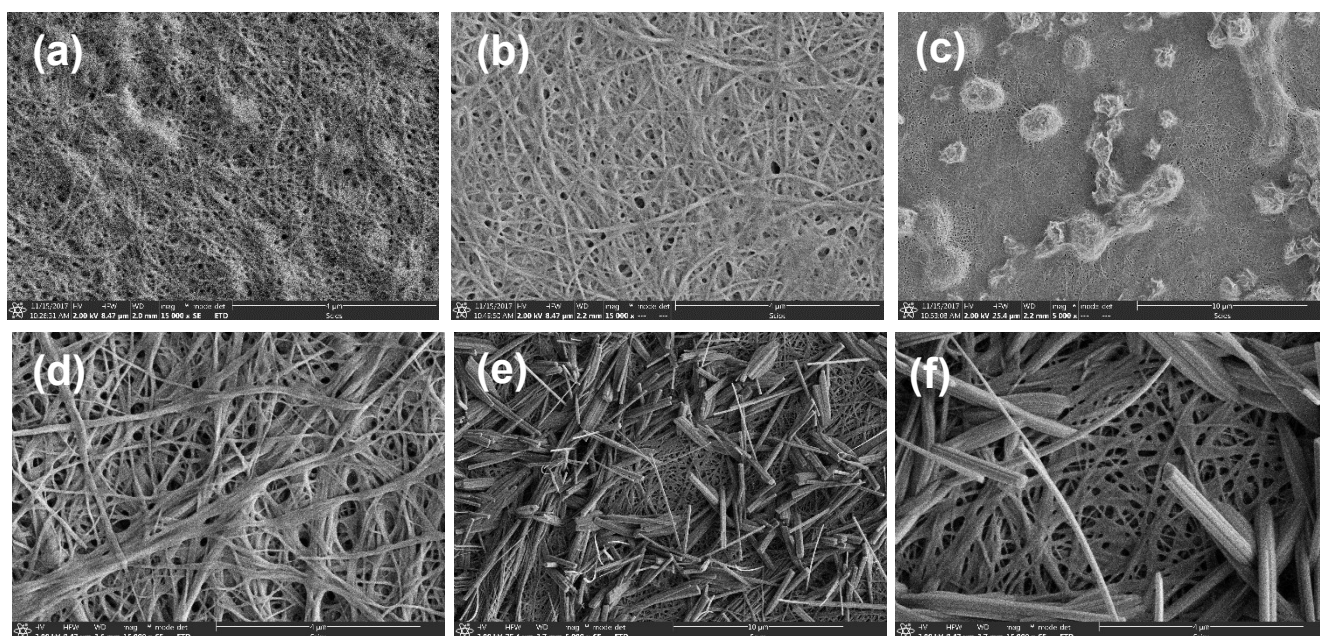

**Figure S1.** SEM images of the xerogel samples prepared from toluene: (a) 0.06% (w/v) gel of **G**, (b) and (c) 0.06% (w/v) of **G** in presence of 0.2 % (w/v) CBZ, (d) 0.25% (w/v) gel of **G**, (e) and (f) 0.25% (w/v) gel of **G** in presence of 0.2 % (w/v) CBZ.

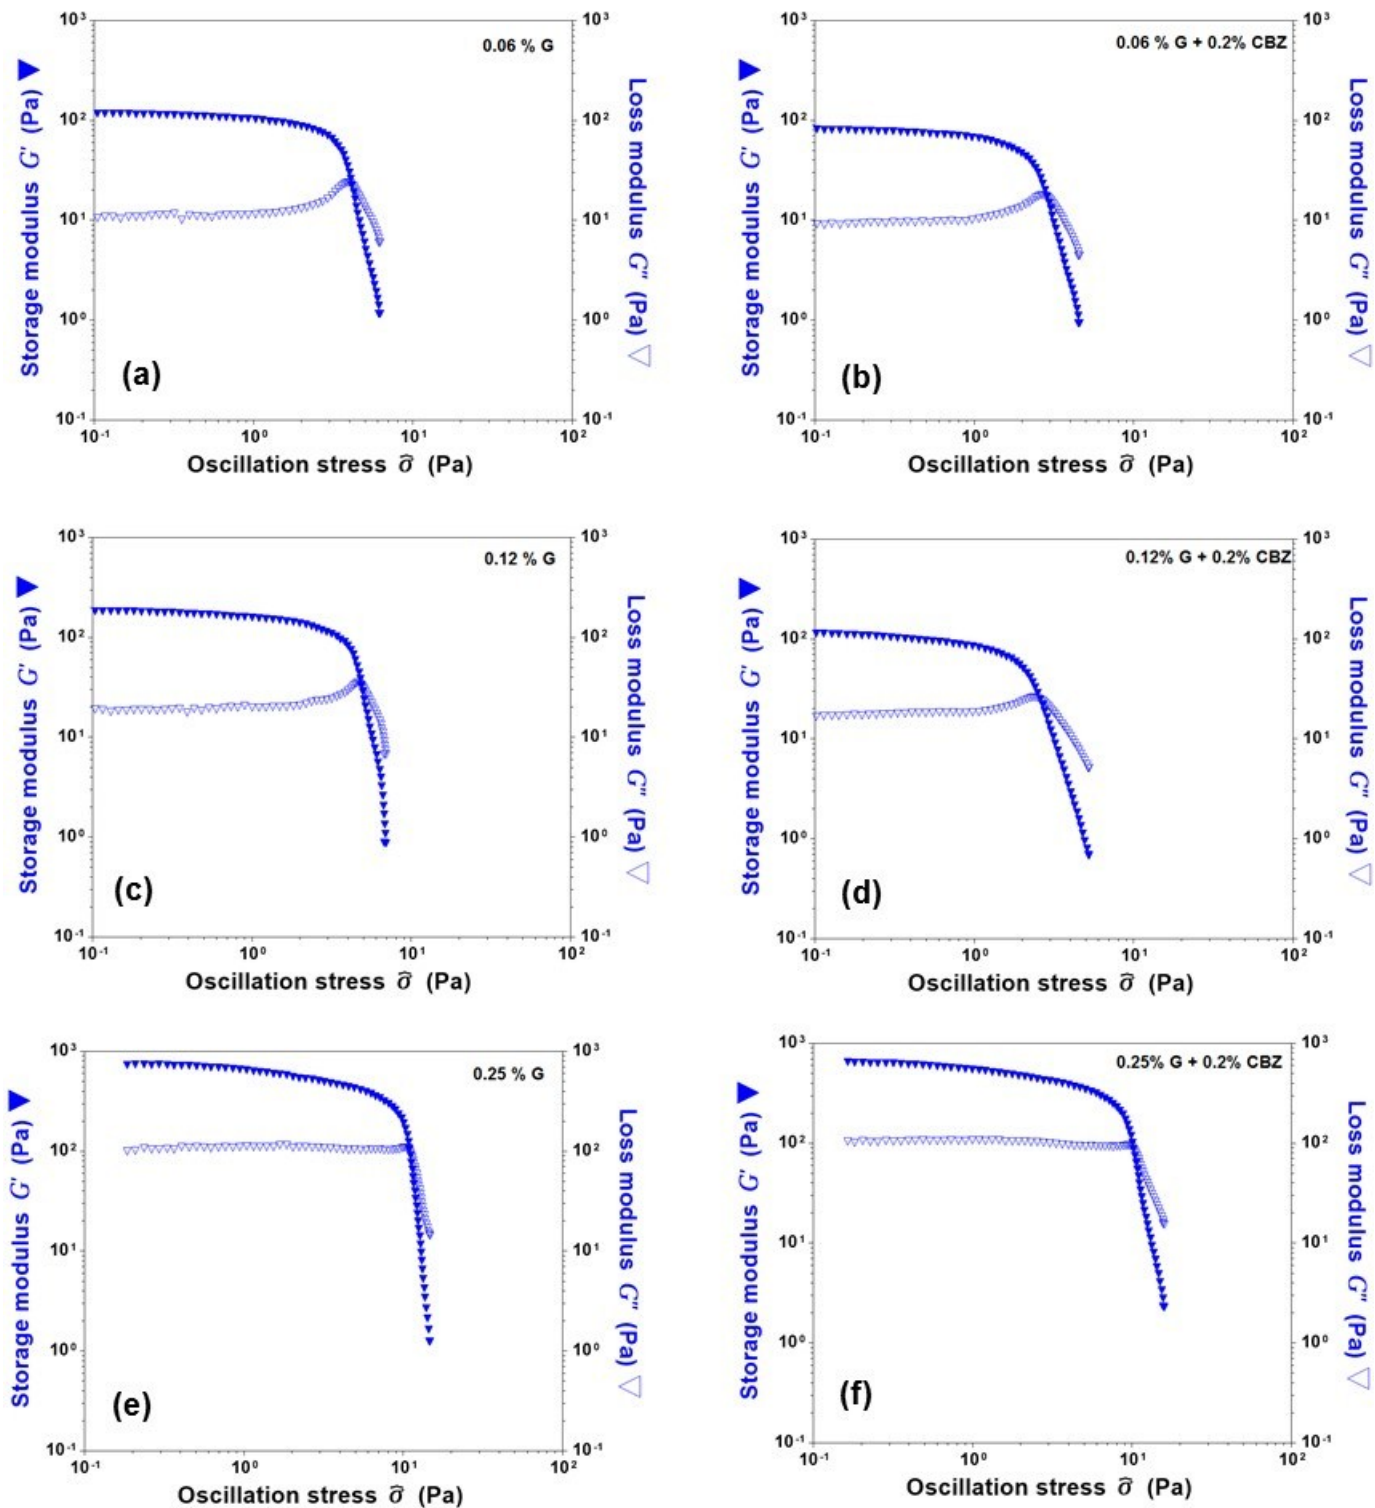

**Figure S2.** Stress sweep experiments performed at a constant frequency of 1 Hz: Gel samples (a, c, e), and gel samples with CBZ (b, d, f), prepared in toluene, at 25 °C (concentrations are expressed in % w/v).

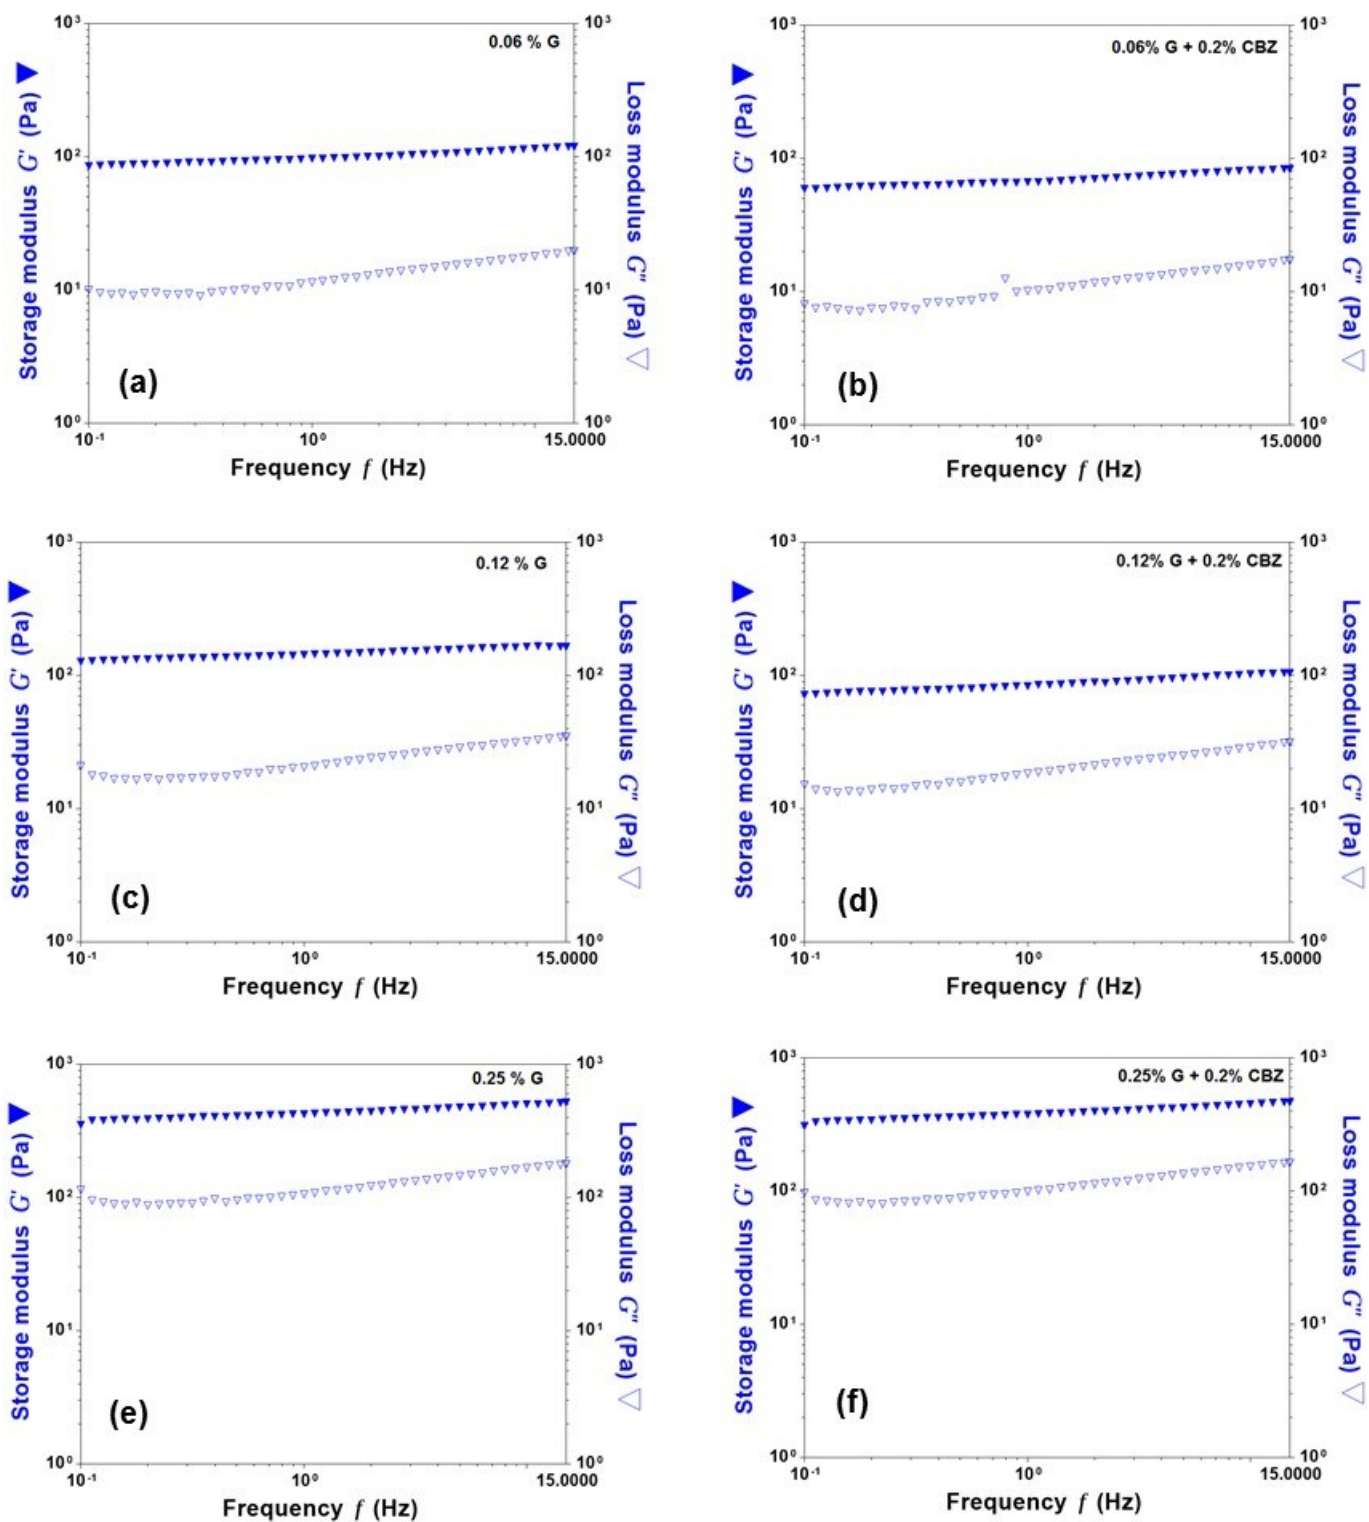

**Figure S3.** Frequency sweep experiments performed at a constant strain of 1%: Gel samples (a, c, e), and gel samples with CBZ (b, d, f), prepared in toluene, at 25 °C (concentrations are expressed in % w/v).

# SANS

**Table S1:** Scattering length densities for the individual components and gelator with drug mixtures for the SANS analyses. Calculated using NIST's neutron activation and scattering calculator, <https://www.ncnr.nist.gov/resources/activation/>

| Sample             | Scattering Length Density ( $\text{\AA}^{-2}$ ) |
|--------------------|-------------------------------------------------|
| G                  | 8.2e-07                                         |
| CBZ                | 2.023e-6                                        |
| 0.06% G + 0.2% CBZ | 1.745e-06                                       |
| 0.12% G + 0.2% CBZ | 1.572e-06                                       |
| 0.25% G + 0.2% CBZ | 1.355e-06                                       |
| D8-toluene         | 5.664e-06                                       |

### Power Law Analysis of 0.25 w/v% G:

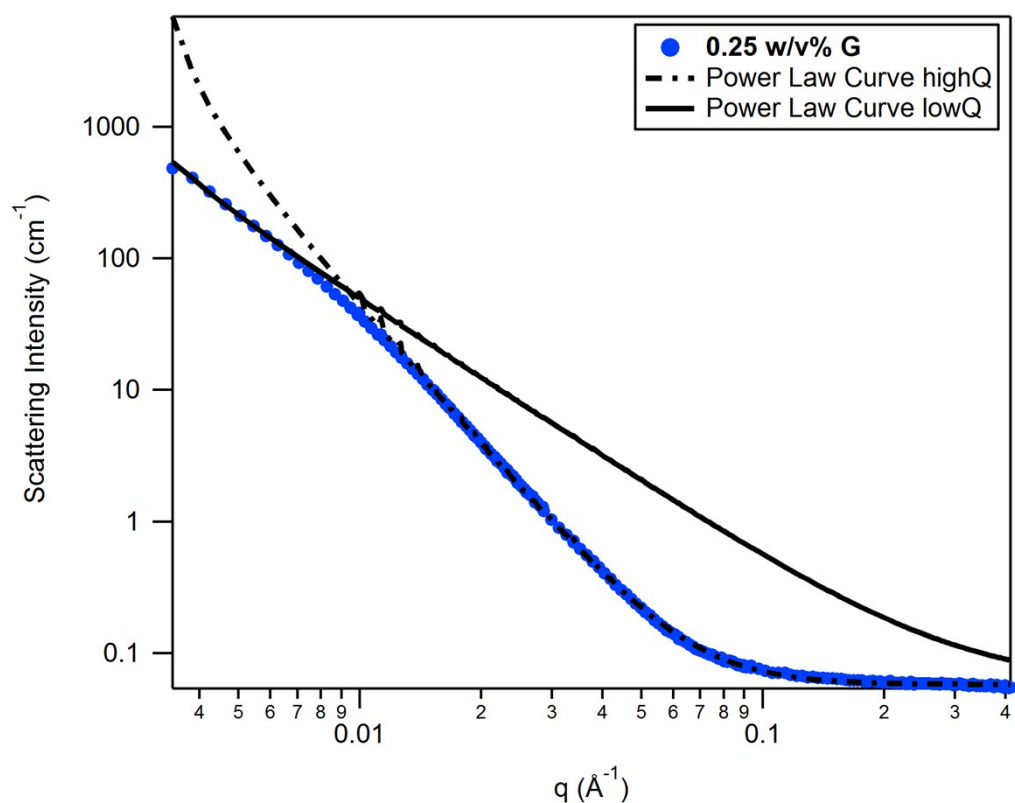

|                            | Low $Q$    |         |             | High $Q$   |         |            |
|----------------------------|------------|---------|-------------|------------|---------|------------|
| Coefficient, A =           | 0.00521294 | ±       | 0.000563395 | 5.20767e-6 | ±       | 3.88441e-8 |
| (-)Power =                 | 1.98222    | ±       | 0.0199313   | 3.44543    | ±       | 0.00195882 |
| Bkgd (cm <sup>-1</sup> ) = | 0.0577534  | ±       | 0           | 0.0577534  | ±       | 6.09244e-5 |
| Fitted Range =             | 0.003433   | < $Q$ < | 0.006261    | 0.01555    | < $Q$ < | 0.4121     |

The Power Law model was used to determine the slopes (the (-)Power parameter) of the high and low  $Q$  regions, with the respective fitted ranges kept within the straight portions of the curve. Based on the error bars and how closely each fit follows the data over its fitted range, the fits are good. The background value for the low  $Q$  fit was held constant and equal to the background value obtained from the high  $Q$  fit to prevent overfitting.

### Gel Fit Model to 0.25 w/v% G:

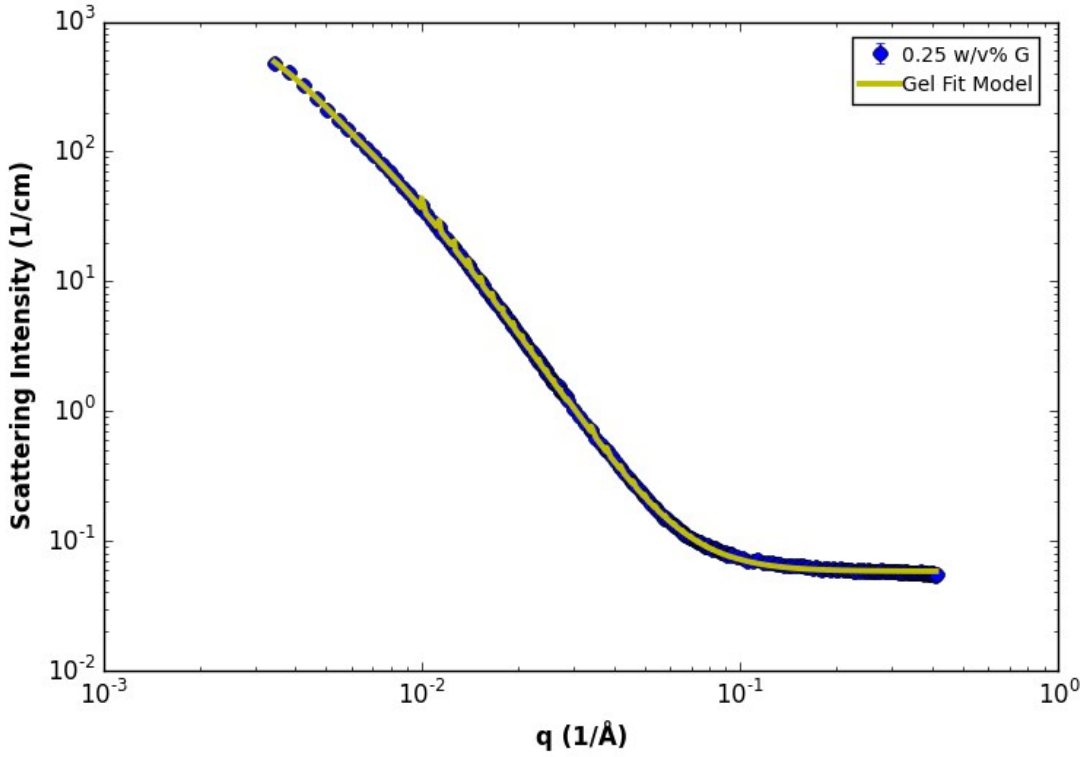

|                                 |          |         |           |
|---------------------------------|----------|---------|-----------|
| FractalExp ( $D$ ) =            | 3.5886   | $\pm$   | 0.0030842 |
| Guinier Scale ( $I(0)_G$ ) =    | 1012     | $\pm$   | 86.649    |
| Radius ( $R_g$ ) =              | 745.8    | $\pm$   | 17.804    |
| Lorentzian Scale ( $I(0)_L$ ) = | 586.9    | $\pm$   | 7.4303    |
| Correlation Length ( $a_l$ ) =  | 160.23   | $\pm$   | 0.85071   |
| Bkgd ( $\text{cm}^{-1}$ ) =     | 0.058262 | $\pm$   | 6.1319e-5 |
| Sqrt( $\chi^2/N$ ) =            | 2.8912   |         |           |
| Fitted Range =                  | 0.003433 | $< Q <$ | 0.4121    |

The fit follows the data closely, the error bars are small compared to their respective fitting parameter, and the  $\text{sqrt}(\chi^2/N)$  value is small, suggesting a good fit. Furthermore, the fractal dimension  $D$  parameter is also sufficiently close to the high  $Q$  slope determined from the Power Law fitting to suggest that these analyses do not contradict. The model is general enough to be able to apply to different types of gels while still describing the basic characteristics of the gel structure, thus reducing the risk of overfitting the data. For these reasons, this model was chosen in conjunction with the Power Law analysis.

### Modified Correlation Length Model to 0.25 w/v% G:

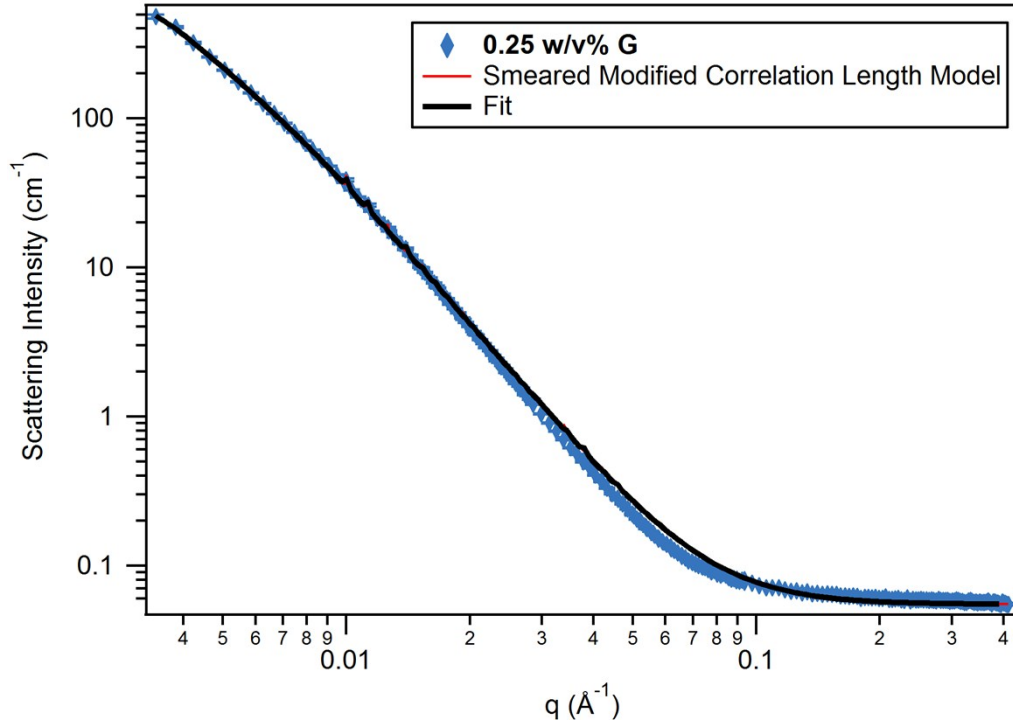

|                                     |          |         |           |
|-------------------------------------|----------|---------|-----------|
| Dimensionality ( $s$ ) =            | 1.25967  | $\pm$   | 2.84      |
| High- $Q$ Scale =                   | 0.482988 | $\pm$   | 96.2      |
| Screening Length ( $\text{\AA}$ ) = | 194.09   | $\pm$   | 0         |
| High- $Q$ Porod Exponent =          | 2.02461  | $\pm$   | 5.97e-157 |
| Bgd ( $\text{cm}^{-1}$ ) =          | 0.055    | $\pm$   | 8.05e-158 |
| Sqrt( $\chi^2/N$ ) =                | 0.8653   |         |           |
| Fitted Range =                      | 0.003433 | $< Q <$ | 0.4121    |

This model is similar to the Correlation Length model, except it incorporates a stretching term  $1/Q^s$ . The parameter  $s$  is a stretching factor, where  $s = 0$  indicates an unstretched mass fractal network and  $s = 1$  means the network is fully stretched. Here,  $s > 1$  which is not feasible given this definition. The error bars are large for  $s$  and the scaling factor. The high- $Q$  Porod exponent also does not agree with that found from the Power Law fitting. The model also does not fit the  $0.02 < Q < 0.1$  region as well as the other models. For these reasons, this model was not chosen.

### Fractal Flexible Cylinder fit to 0.25 w/v% G:

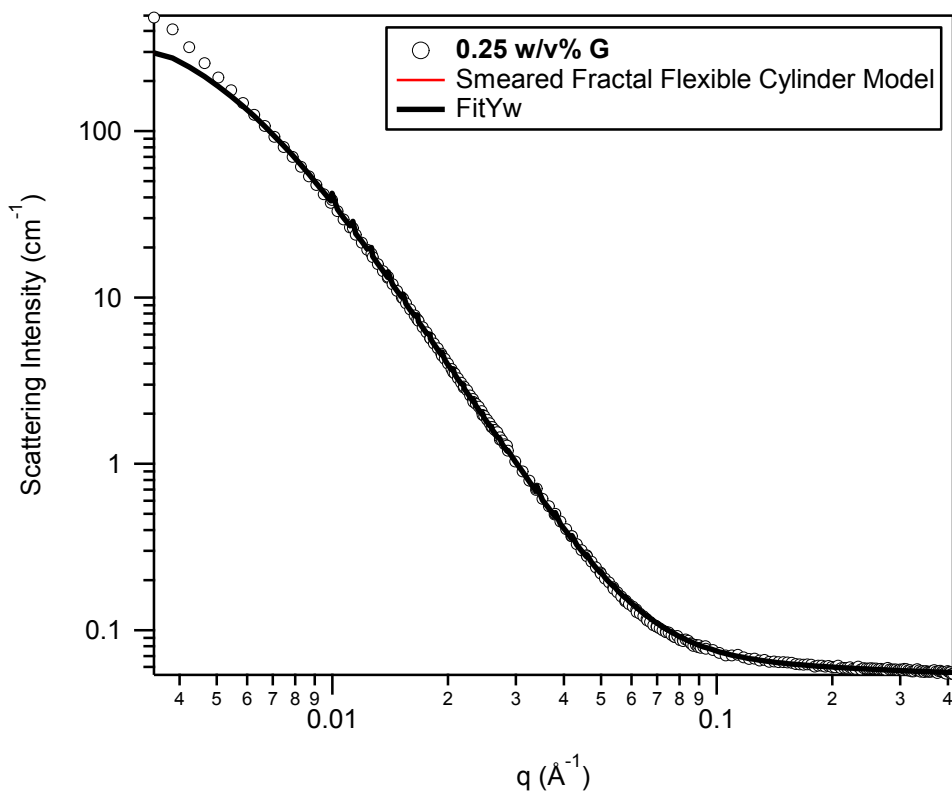

|                                  |            |         |             |
|----------------------------------|------------|---------|-------------|
| Volume Fraction (scale) =        | 0.00159859 | ±       | 0.000725494 |
| fractal dimension =              | 2.90567    | ±       | 0.00090077  |
| correlation length (Å) =         | 190.089    | ±       | 0.494126    |
| SLD block (Å <sup>-2</sup> ) =   | 8.2e-07    | ±       | 0           |
| SLD solvent (Å <sup>-2</sup> ) = | 5.664e-06  | ±       | 0           |
| Contour Length (Å) =             | 23.5656    | ±       | 0.0239447   |
| Kuhn Length, b (Å) =             | 11.5796    | ±       | 0.0149754   |
| Cylinder Radius (Å) =            | 5.13415    | ±       | 1.17028     |
| bkgd (cm <sup>-1</sup> ) =       | 0.0549175  | ±       | 0.000600213 |
| Sqrt( $\chi^2/N$ ) =             | 3.8653     |         |             |
| Fitted Range =                   | 0.003433   | < $Q$ < | 0.412       |

Although this model is consistent with the morphology depicted in the SEM images and the error bars for the individual variables and the  $\sqrt{\chi^2/N}$  value are small, the model does not fit the data well over the low  $Q$  region. The fractal dimension parameter does not agree well with either of those determined from the Power Law analysis, suggesting that these methods contradict each other. This model was also incapable of producing a unique solution; it was fitted to the data multiple times (one example shown here), and each time yielded different contour length, Kuhn length, and cylinder radius results. Many times, the Kuhn length was reported as being larger than the contour length, which does not make physical sense. There is also the risk of this model overfitting the data due to the lack of scattering features such as peaks. For these reasons, this model was not chosen as the best model to analyze the data.

### Dilute Lamellar fit to 0.25 w/v% G:

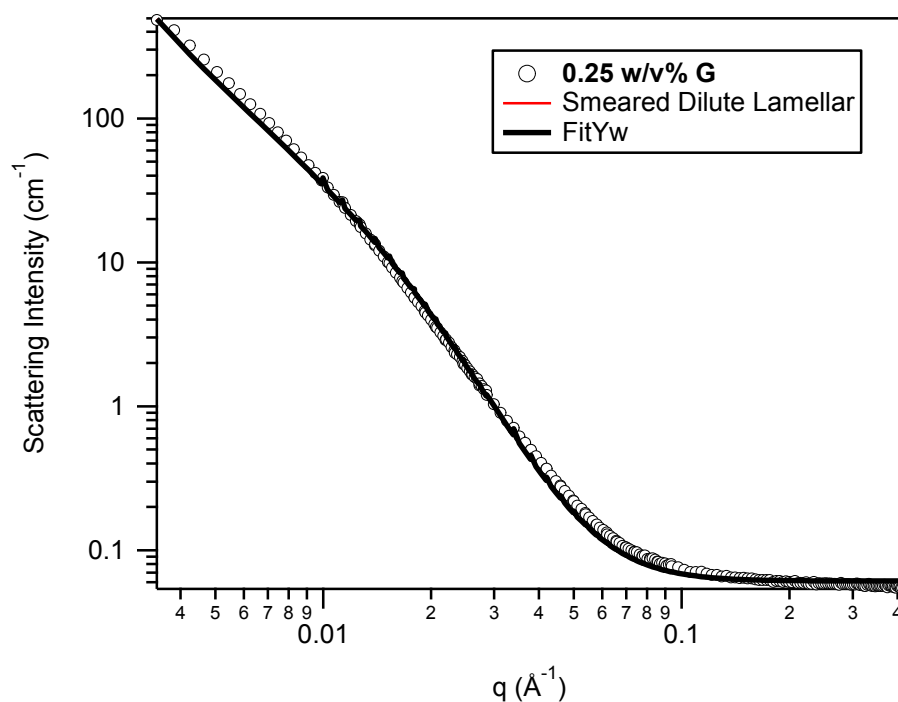

|                                      |             |       |             |
|--------------------------------------|-------------|-------|-------------|
| Scale =                              | 0.000812575 | ±     | 0.000216977 |
| Bilayer Thick (delta) (Å) =          | 33.5592     | ±     | 9.0087      |
| polydisp of thickness =              | 3.14579     | ±     | 0.930426    |
| SLD bilayer (Å <sup>-2</sup> ) =     | 8.2e-07     | ±     | 0           |
| SLD solvent (Å <sup>-2</sup> ) =     | 5.664e-06   | ±     | 0           |
| Incoherent Bgd (cm <sup>-1</sup> ) = | 0.0610335   | ±     | 5.82968e-05 |
| Sqrt( $\chi^2/N$ ) =                 | 11.1755     |       |             |
| Fitted Range =                       | 0.003433    | < Q < | 0.4121      |

Visually, the model does not fit well to the data. The model also has a large sqrt( $\chi^2/N$ ) value, further supporting the conclusion that this model is not a good choice for this data. Lastly, when the SEM images were obtained showing that the gel structure was a fibrous network, it was clear that a lamellar structure was not a relevant form factor. For these reasons, this model was not chosen.

### Guinier-Porod fit to 0.25 w/v% G:

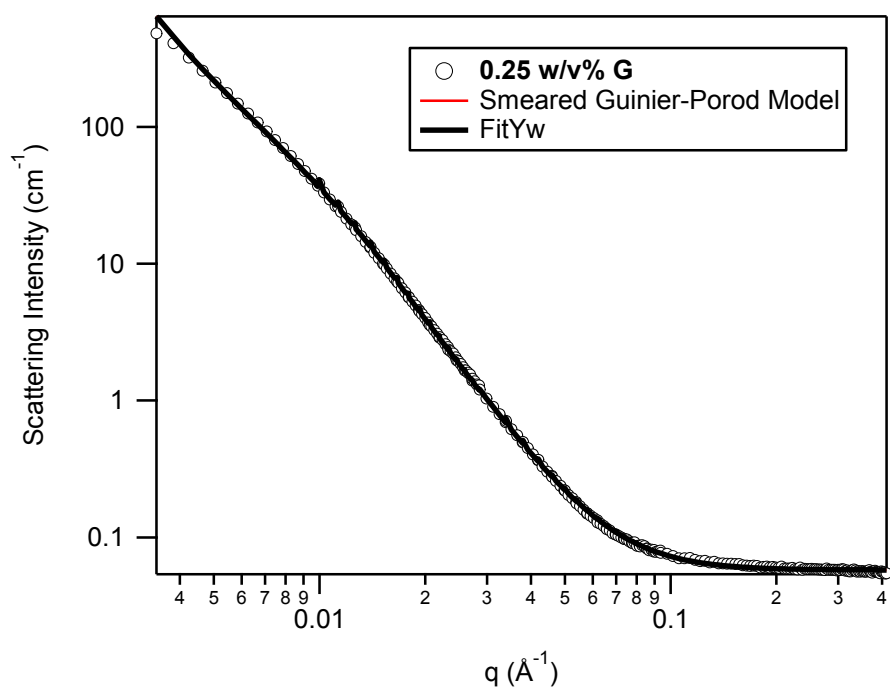

|                                |            |         |             |
|--------------------------------|------------|---------|-------------|
| Guinier Scale =                | 0.00230462 | ±       | 8.62179e-05 |
| Dimension Variable, $s$ =      | 2.14749    | ±       | 0.0072268   |
| $R_g$ (Å) =                    | 49.3515    | ±       | 0.502803    |
| Porod Exponent =               | 3.4447     | ±       | 0.00205459  |
| $B_{gd}$ (cm <sup>-1</sup> ) = | 0.0577553  | ±       | 6.10797e-05 |
| $\text{Sqrt}(\chi^2/N)$ =      | 3.35675    |         |             |
| Fitted Range =                 | 0.003433   | $< Q <$ | 0.4121      |

The model looks like it fits well to the data, which is further supported by the low  $\text{sqrt}(\chi^2/N)$  value and small error bar for each variable. However, the model suggests that the slope of the data when  $Q < 0.01$  is 2.14 (the dimension variable  $s$ ) and the slope for  $Q > 0.01$  is 3.44 (the Porod exponent). Close examination of the data shows that the slopes do not differ so noticeably, which means that the  $s$  and Porod exponent values returned by the model do not make sense. Additionally, an  $s$  value of 2 suggests that the structure is plate-like, which is contradicted by the SEM images. For these reasons, this model was not chosen.

### Power Law Analysis of 0.12 w/v% G:

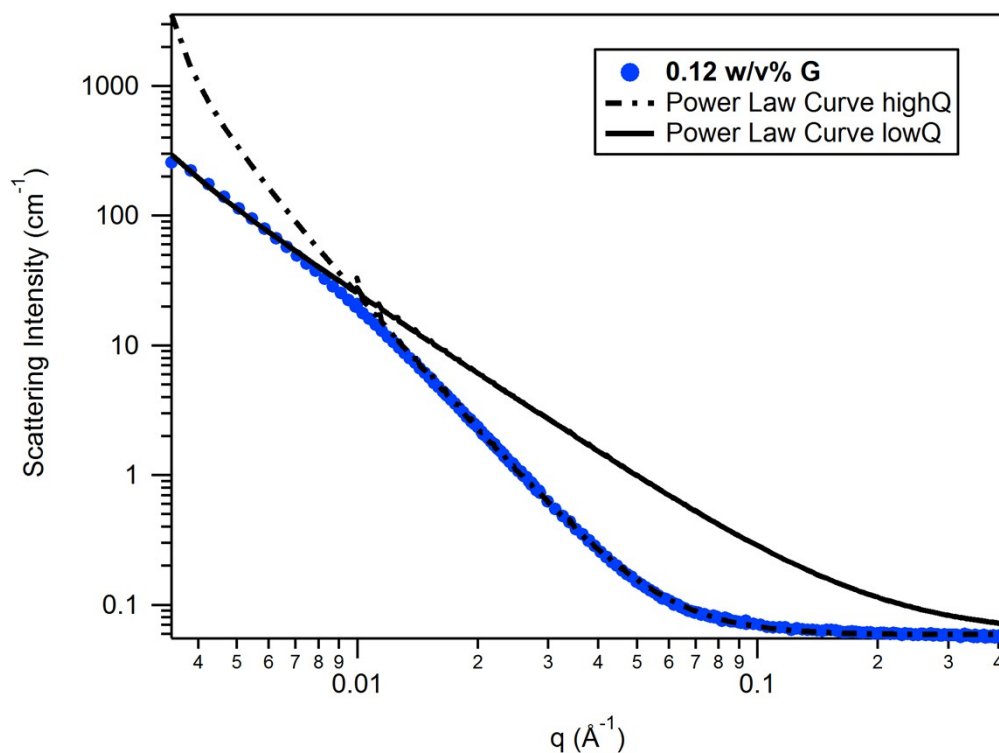

|                            | Low $Q$    |         |             | High $Q$   |         |            |
|----------------------------|------------|---------|-------------|------------|---------|------------|
| Coefficient, A =           | 0.00206433 | ±       | 0.000154097 | 3.40483e-6 | ±       | 3.76737e-8 |
| (-)Power =                 | 2.03578    | ±       | 0.0139882   | 3.41134    | ±       | 0.00291469 |
| Bkgd (cm <sup>-1</sup> ) = | 0.0588715  | ±       | 0           | 0.0588715  | ±       | 6.11913e-5 |
| Fitted Range =             | 0.003433   | < $Q$ < | 0.006665    | 0.01393    | < $Q$ < | 0.4121     |

The Power Law model was used to determine the slopes (the (-)Power parameter) of the high and low  $Q$  regions, with the respective fitted ranges kept within the straight portions of the curve. Based on the error bars and how closely each fit follows the data over its fitted range, the fits are good. The background value for the low  $Q$  fit was held constant and equal to the background value obtained from the high  $Q$  fit to prevent overfitting.

**Gel Fit Model to 0.12 w/v% G:**

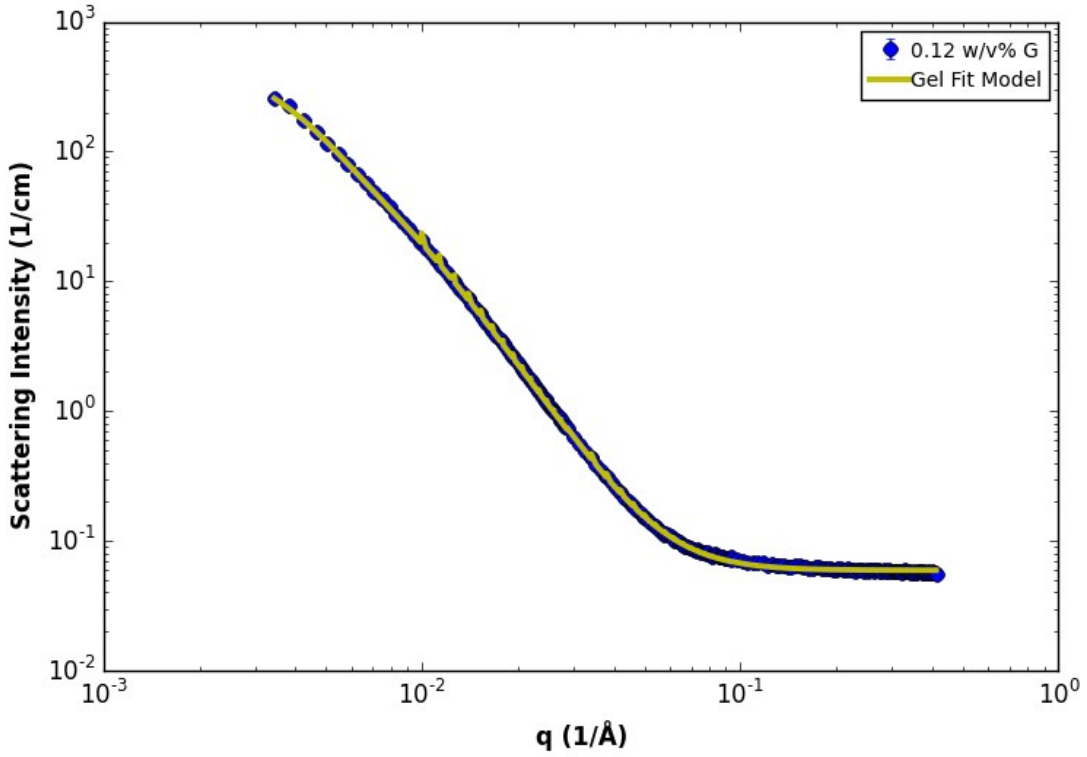

|                                 |          |         |           |
|---------------------------------|----------|---------|-----------|
| FractalExp ( $D$ ) =            | 3.5751   | ±       | 0.0047714 |
| Guinier Scale ( $I(0)_G$ ) =    | 441.21   | ±       | 21.574    |
| Radius ( $R_g$ ) =              | 631.56   | ±       | 9.9053    |
| Lorentzian Scale ( $I(0)_L$ ) = | 247.71   | ±       | 4.1604    |
| Correlation Length ( $a_l$ ) =  | 147.5    | ±       | 1.0954    |
| Bkgd ( $\text{cm}^{-1}$ ) =     | 0.059259 | ±       | 6.1633e-5 |
| Sqrt( $\chi^2/N$ ) =            | 2.6364   |         |           |
| Fitted Range =                  | 0.003433 | < $Q$ < | 0.4121    |

The fit follows the data closely, the error bars are small compared to their respective fitting parameter, and the  $\text{sqrt}(\chi^2/N)$  value is small, suggesting a good fit. Furthermore, the fractal dimension  $D$  parameter is also sufficiently close to the high  $Q$  slope determined from the Power Law fitting to suggest that these analyses do not contradict. The model is general enough to be able to apply to different types of gels while still describing the basic characteristics of the gel structure, thus reducing risk of overfitting the data. For these reasons, this model was chosen in conjunction with the Power Law analysis.

### Power Law Analysis of 0.06 w/v% G:

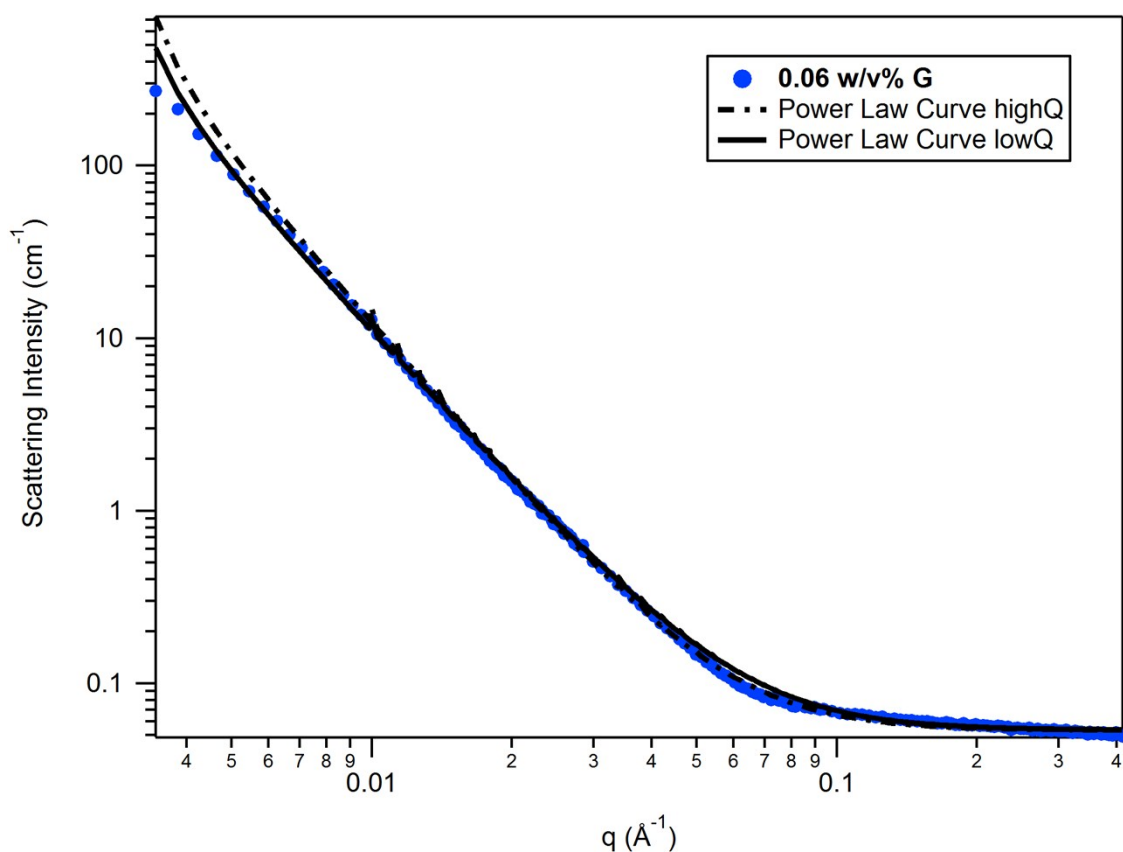

|                            | Low $Q$    |         |            | High $Q$   |         |            |
|----------------------------|------------|---------|------------|------------|---------|------------|
| Coefficient, A =           | 2.32864e-5 | ±       | 2.93524e-7 | 1.21037e-5 | ±       | 2.03846e-7 |
| (-)Power =                 | 2.82423    | ±       | 0.002739   | 2.98818    | ±       | 0.00482327 |
| Bkgd (cm <sup>-1</sup> ) = | 0.0534047  | ±       | 0          | 0.0534047  | ±       | 6.46391e-5 |
| Fitted Range =             | 0.003433   | < $Q$ < | 0.01232    | 0.02194    | < $Q$ < | 0.4121     |

The Power Law model was used to determine the slopes (the (-)Power parameter) of the high and low  $Q$  regions, with the respective fitted ranges kept within the straight portions of the curve. Based on the error bars and how closely each fit follows the data over its fitted range, the fits are good. The background value for the low  $Q$  fit was held constant and equal to the background value obtained from the high  $Q$  fit to prevent overfitting.

### Gel Fit Model to 0.06 w/v% G:

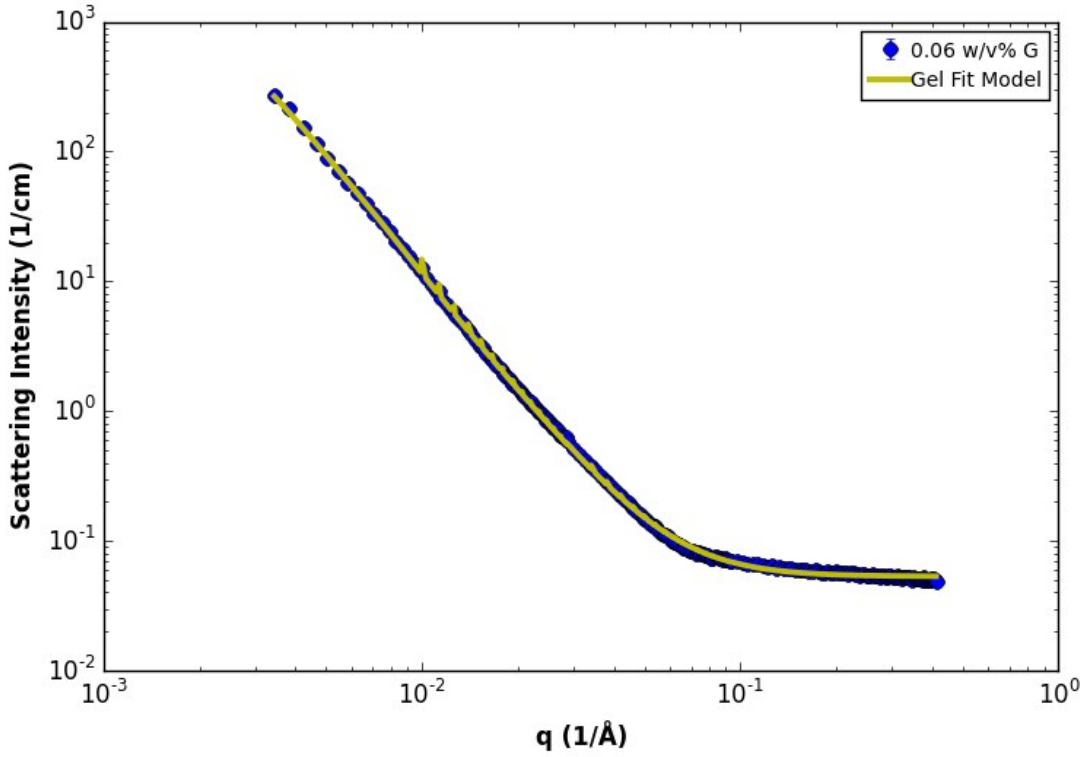

|                                 |          |         |           |
|---------------------------------|----------|---------|-----------|
| FractalExp ( $D$ ) =            | 2.9216   | ±       | 0.0031011 |
| Guinier Scale ( $I(0)_G$ ) =    | 13.387   | ±       | 1.3882    |
| Radius ( $R_g$ ) =              | 329.82   | ±       | 7.6135    |
| Lorentzian Scale ( $I(0)_L$ ) = | 2088.2   | ±       | 100.89    |
| Correlation Length ( $a_l$ ) =  | 535.74   | ±       | 9.8641    |
| Bkgd ( $\text{cm}^{-1}$ ) =     | 0.053112 | ±       | 6.2987e-5 |
| Sqrt( $\chi^2/N$ ) =            | 3.8333   |         |           |
| Fitted Range =                  | 0.003433 | < $Q$ < | 0.4121    |

The fit follows the data closely, the error bars are small compared to their respective fitting parameter, and the  $\text{sqrt}(\chi^2/N)$  value is small, suggesting a good fit. Furthermore, the fractal dimension  $D$  parameter is also sufficiently close to the high  $Q$  slope determined from the Power Law fitting to suggest that these analyses do not contradict. The model is general enough to be able to apply to different types of gels while still describing the basic characteristics of the gel structure, thus reducing risk of overfitting the data. For these reasons, this model was chosen in conjunction with the Power Law analysis.

**Gel Fit Model to 0.25 w/v% G + 0.2 w/v% CBZ data minus 0.2 w/v% CBZ data:**

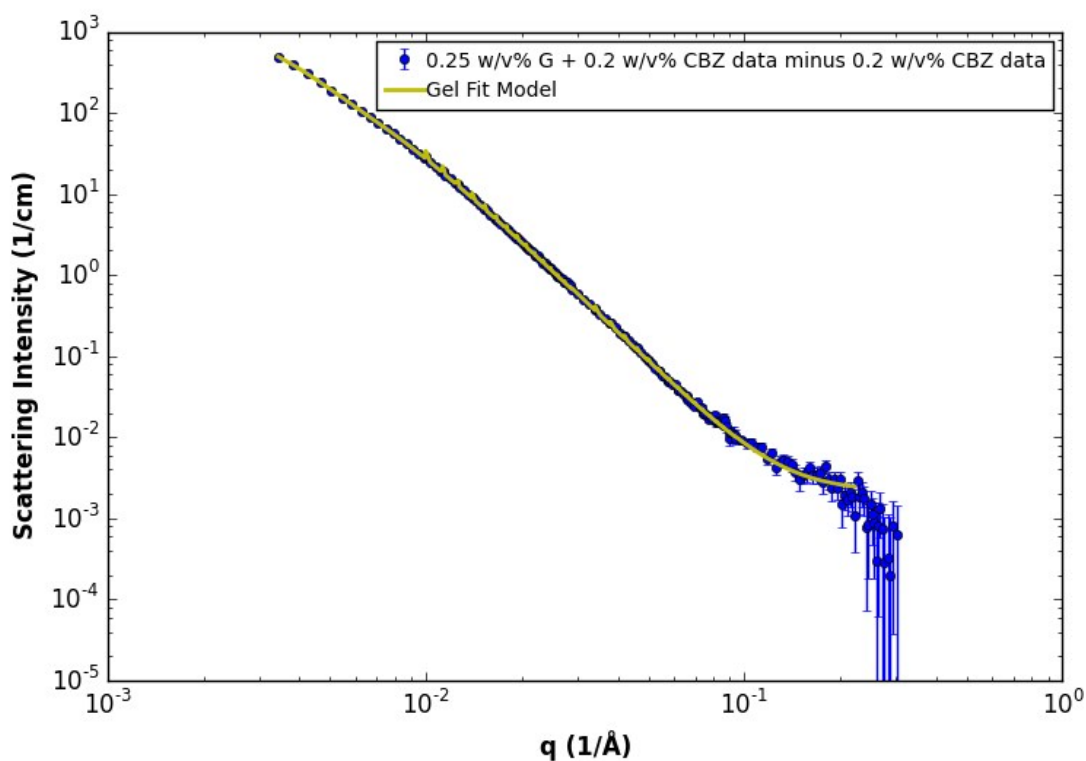

|                                 |          |         |          |
|---------------------------------|----------|---------|----------|
| FractalExp ( $D$ ) =            | 3.7717   | ±       | 0.004802 |
| Guinier Scale ( $I(0)_G$ ) =    | 1265.4   | ±       | 103.87   |
| Radius ( $R_g$ ) =              | 803.58   | ±       | 19.099   |
| Lorentzian Scale ( $I(0)_L$ ) = | 646.76   | ±       | 10.857   |
| Correlation Length ( $a_l$ ) =  | 170.83   | ±       | 1.2032   |
| Bkgd ( $\text{cm}^{-1}$ ) =     | 0.00216  | ±       | 0.000127 |
| Sqrt( $\chi^2/N$ ) =            | 2.4938   |         |          |
| Fitted Range =                  | 0.003433 | < $Q$ < | 0.2222   |

The fit follows the data closely, the error bars are small compared to their respective fitting parameter, and the  $\text{sqrt}(\chi^2/N)$  value is small, suggesting a good fit. The model is general enough to be able to apply to different types of gels while still describing the basic characteristics of the gel structure, thus reducing risk of overfitting the data.

**Gel Fit Model to 0.12 w/v% G + 0.2 w/v% CBZ data minus 0.2 w/v% CBZ data:**

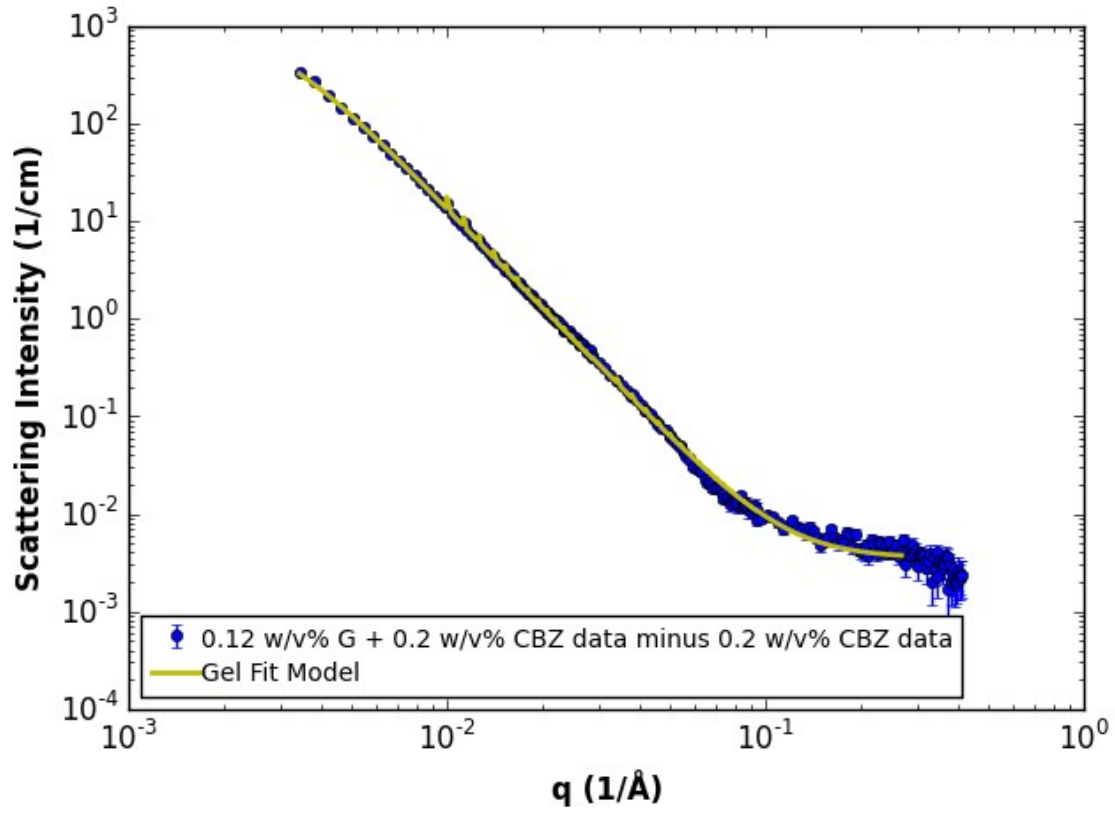

|                                 |          |         |          |
|---------------------------------|----------|---------|----------|
| FractalExp ( $D$ ) =            | 3.3481   | ±       | 0.006083 |
| Guinier Scale ( $I(0)_G$ ) =    | 5.6933   | ±       | 0.89327  |
| Radius ( $R_g$ ) =              | 280.33   | ±       | 10.075   |
| Lorentzian Scale ( $I(0)_L$ ) = | 1697.3   | ±       | 53.313   |
| Correlation Length ( $a_l$ ) =  | 358.82   | ±       | 4.7111   |
| Bkgd (cm $^{-1}$ ) =            | 0.003524 | ±       | 0.000112 |
| Sqrt( $\chi^2/N$ ) =            | 2.6756   |         |          |
| Fitted Range =                  | 0.003433 | < $Q$ < | 0.2673   |

The fit follows the data closely, the error bars are small compared to their respective fitting parameter, and the  $\text{sqrt}(\chi^2/N)$  value is small, suggesting a good fit. The model is general enough to be able to apply to different types of gels while still describing the basic characteristics of the gel structure, thus reducing risk of overfitting the data.

**Gel Fit Model to 0.06 w/v% G + 0.2 w/v% CBZ data minus 0.2 w/v% CBZ data:**

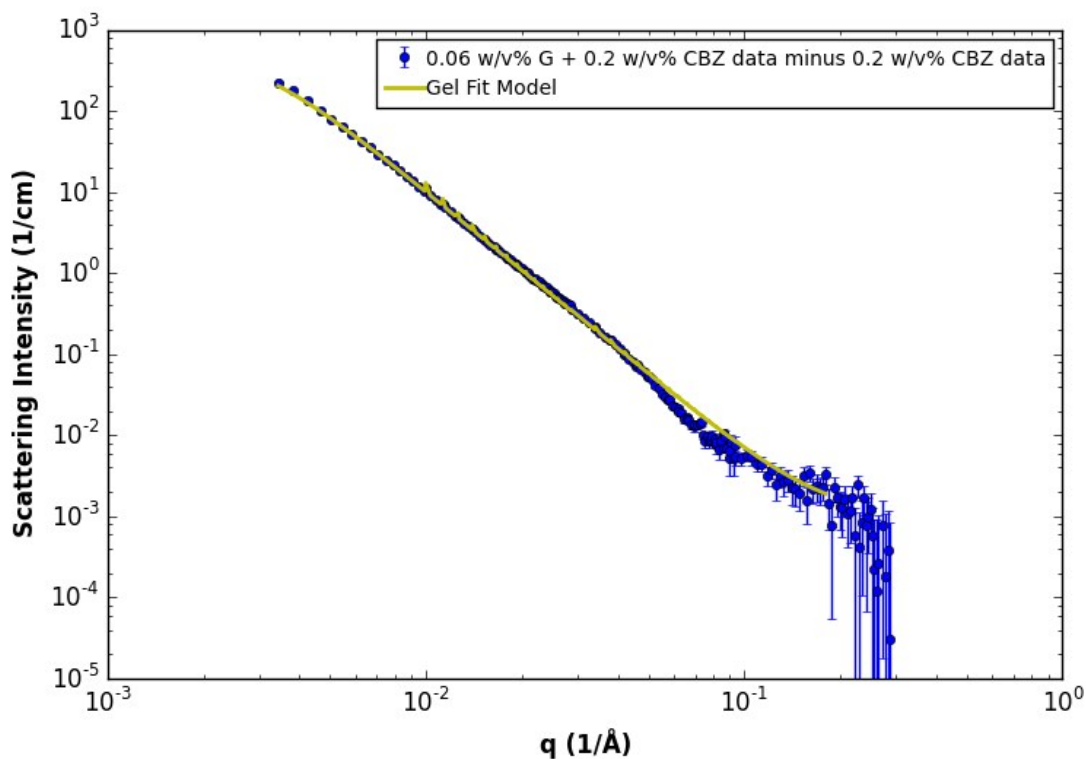

|                                 |          |         |          |
|---------------------------------|----------|---------|----------|
| FractalExp ( $D$ ) =            | 3.2256   | ±       | 0.003316 |
| Guinier Scale ( $I(0)_G$ ) =    | 1.0046   | ±       | 0.15623  |
| Radius ( $R_g$ ) =              | 276.65   | ±       | 10.436   |
| Lorentzian Scale ( $I(0)_L$ ) = | 919.9    | ±       | 20.287   |
| Correlation Length ( $a_l$ ) =  | 343.37   | ±       | 3.0769   |
| Bkgd ( $\text{cm}^{-1}$ ) =     | .001     | ±       | 0        |
| Sqrt( $\chi^2/N$ ) =            | 3.5128   |         |          |
| Fitted Range =                  | 0.003433 | < $Q$ < | 0.18     |

The fit follows the data closely, the error bars are small compared to their respective fitting parameter, and the  $\text{sqrt}(\chi^2/N)$  value is small, suggesting a good fit. The model is general enough to be able to apply to different types of gels while still describing the basic characteristics of the gel structure, thus reducing risk of overfitting the data.

Å

### Power Law Analysis of 0.25 w/v% G + 0.2 w/v% CBZ:

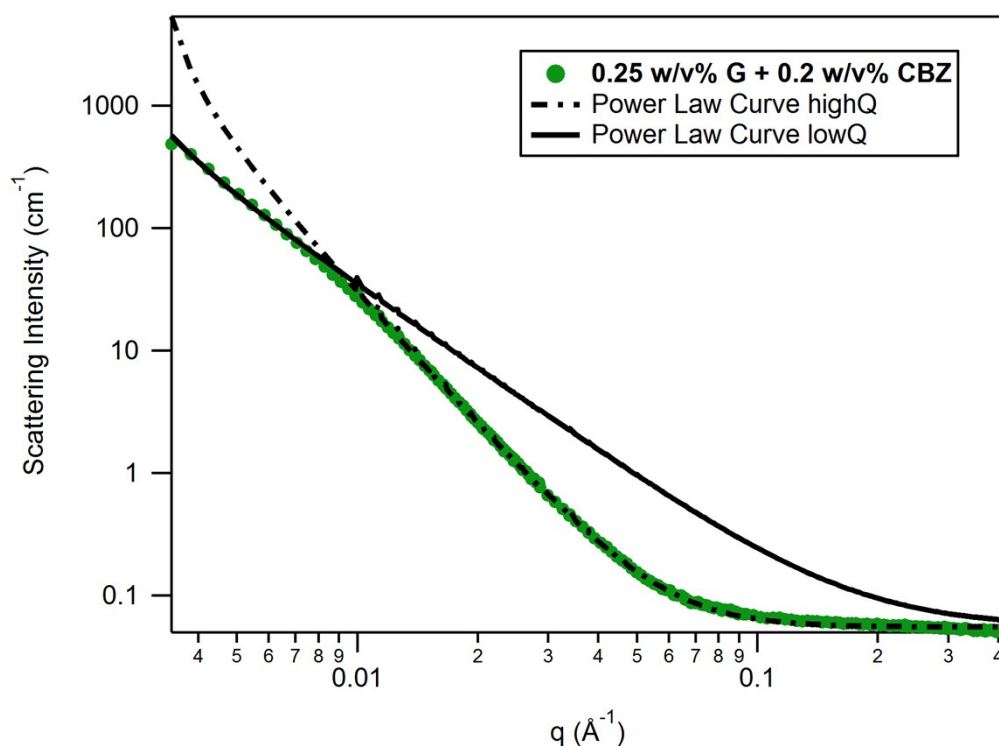

|                            | Low $Q$    |         |            | High $Q$    |         |             |
|----------------------------|------------|---------|------------|-------------|---------|-------------|
| Coefficient, A =           | 0.00102944 | ±       | 5.7909e-05 | 2.67047e-06 | ±       | 2.70104e-08 |
| (-)Power =                 | 2.25524    | ±       | 0.0106801  | 3.50544     | ±       | 0.00264669  |
| Bkgd (cm <sup>-1</sup> ) = | 0.0550477  | ±       | 0          | 0.0550477   | ±       | 5.98028e-05 |
| Fitted Range =             | 0.003433   | < $Q$ < | 0.007069   | 0.01393     | < $Q$ < | 0.4121      |

The Power Law model was used to determine the slopes (the (-)Power parameter) of the high and low  $Q$  regions, with the respective fitted ranges kept within the straight portions of the curve. Based on the error bars and how closely each fit follows the data over its fitted range, the fits are good. The background value for the low  $Q$  fit was held constant and equal to the background value obtained from the high  $Q$  fit to prevent overfitting.

### Gel Fit Model to 0.25 w/v% G + 0.2 w/v% CBZ:

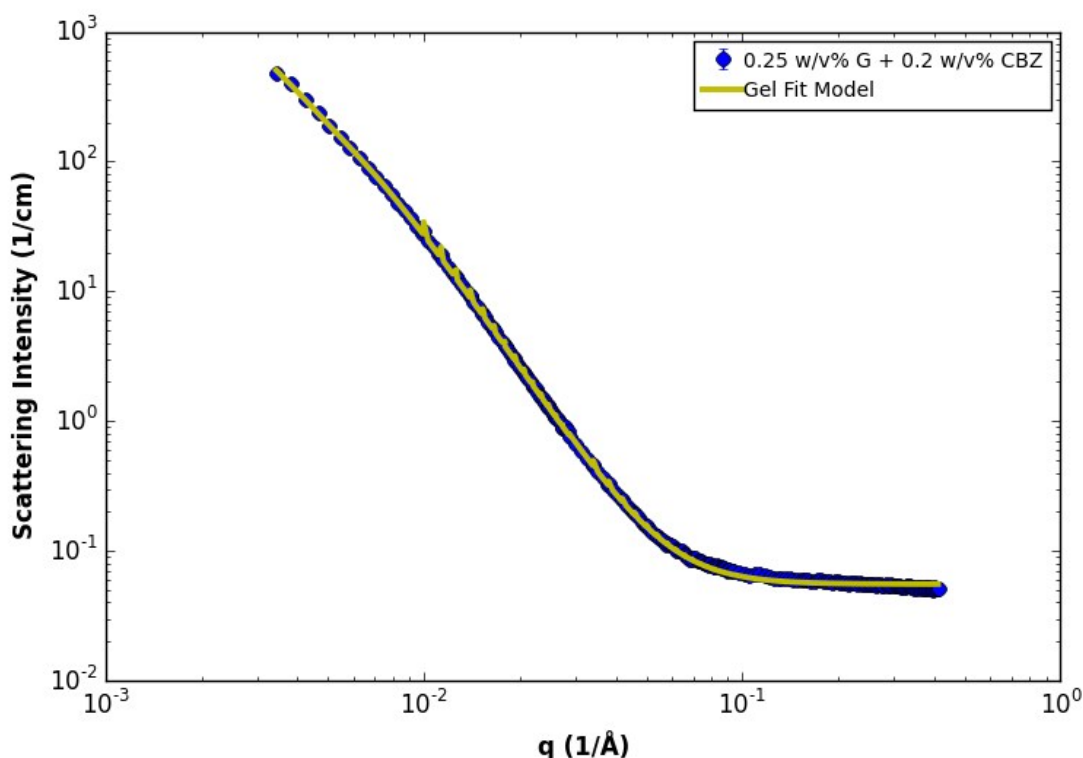

|                                 |          |         |           |
|---------------------------------|----------|---------|-----------|
| FractalExp ( $D$ ) =            | 3.6186   | ±       | 0.0032048 |
| Guinier Scale ( $I(0)_G$ ) =    | 2068.4   | ±       | 369.53    |
| Radius ( $R_g$ ) =              | 1056.7   | ±       | 52.662    |
| Lorentzian Scale ( $I(0)_L$ ) = | 906.2    | ±       | 14.142    |
| Correlation Length ( $a_l$ ) =  | 202.98   | ±       | 1.2576    |
| Bkgd ( $\text{cm}^{-1}$ ) =     | 0.055365 | ±       | 5.9617e-5 |
| Sqrt( $\chi^2/N$ ) =            | 3.9867   |         |           |
| Fitted Range =                  | 0.003433 | < $Q$ < | 0.4121    |

The fit follows the data closely, the error bars are small compared to their respective fitting parameter, and the  $\text{sqrt}(\chi^2/N)$  value is small, suggesting a good fit. Furthermore, the fractal dimension  $D$  parameter is also sufficiently close to the high  $Q$  slope determined from the Power Law fitting to suggest that these analyses do not contradict. The model is general enough to be able to apply to different types of gels while still describing the basic characteristics of the gel structure, thus reducing risk of overfitting the data. For these reasons, this model was chosen in conjunction with the Power Law analysis.

### Power Law Analysis of 0.12 w/v% G + 0.2 w/v% CBZ:

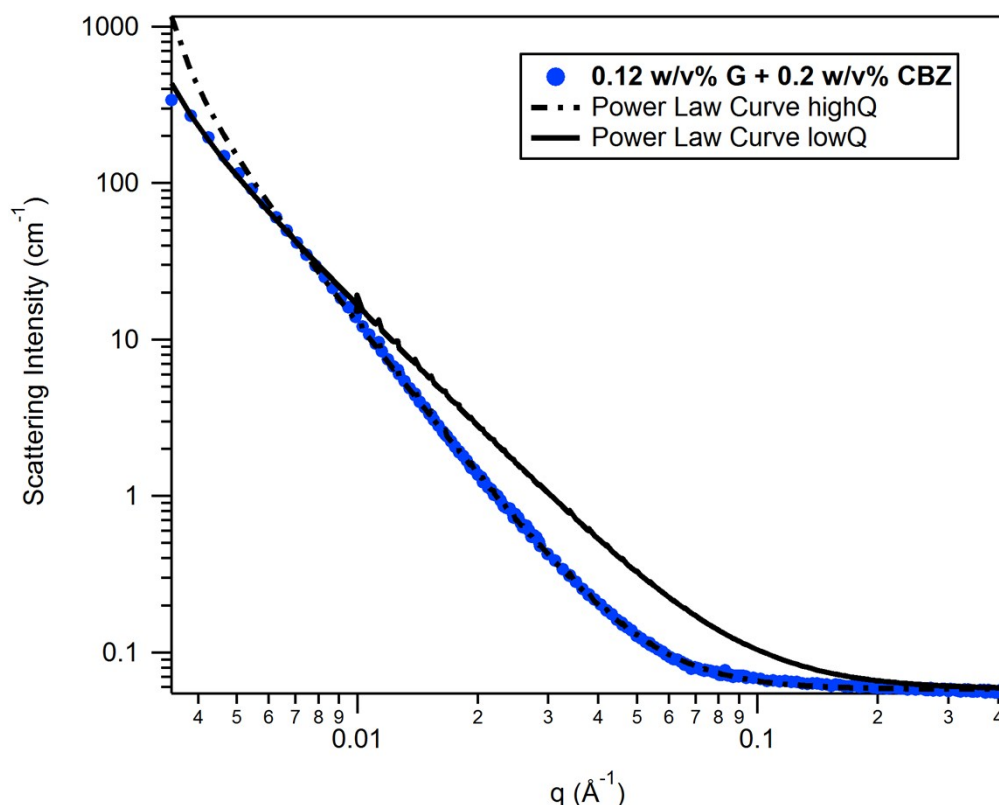

|                            | Low $Q$     |         |            | High $Q$    |         |             |
|----------------------------|-------------|---------|------------|-------------|---------|-------------|
| Coefficient, A =           | 0.000128405 | ±       | 5.8856e-06 | 4.67413e-06 | ±       | 5.61481e-08 |
| (-)Power =                 | 2.54375     | ±       | 0.00884791 | 3.20045     | ±       | 0.00308264  |
| Bkgd (cm <sup>-1</sup> ) = | 0.0580999   | ±       | 0          | 0.0580999   | ±       | 6.08108e-05 |
| Fitted Range =             | 0.003433    | < $Q$ < | 0.006665   | 0.01192     | < $Q$ < | 0.4121      |

The Power Law model was used to determine the slopes (the (-)Power parameter) of the high and low  $Q$  regions, with the respective fitted ranges kept within the straight portions of the curve. Based on the error bars and how closely each fit follows the data over its fitted range, the fits are good. The background value for the low  $Q$  fit was held constant and equal to the background value obtained from the high  $Q$  fit to prevent overfitting.

### Gel Fit Model to 0.12 w/v% G + 0.2 w/v% CBZ:

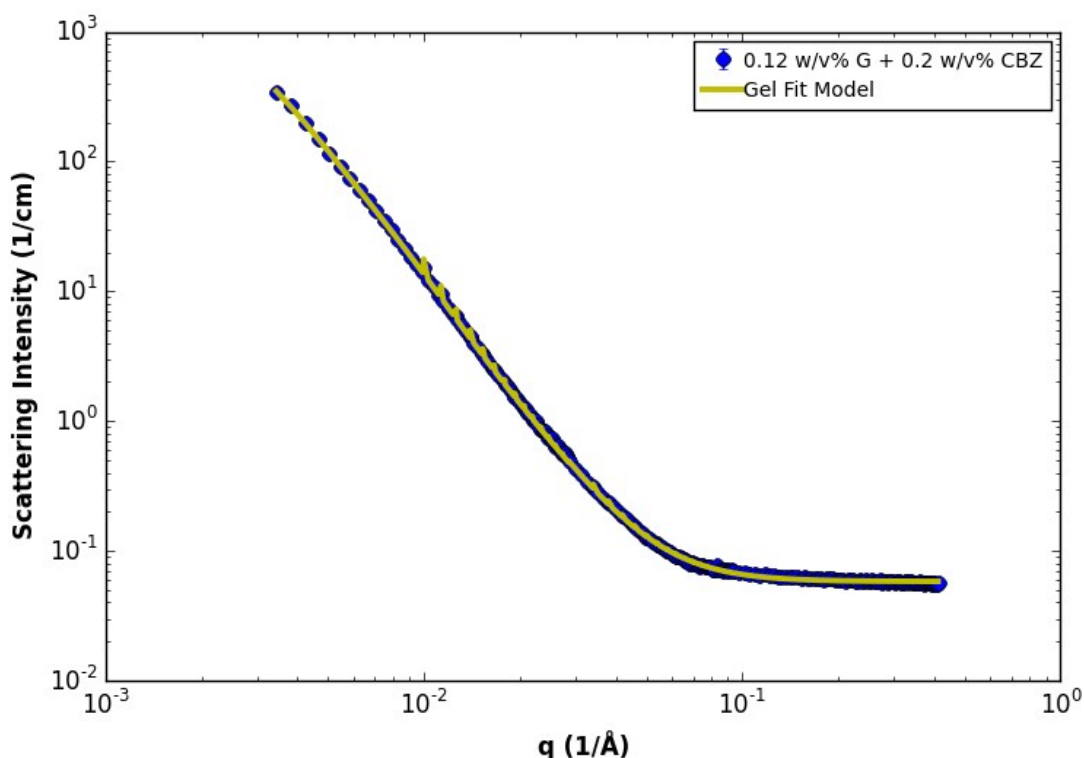

|                                 |          |         |           |
|---------------------------------|----------|---------|-----------|
| FractalExp ( $D$ ) =            | 3.1932   | ±       | 0.0043514 |
| Guinier Scale ( $I(0)_G$ ) =    | 13.437   | ±       | 0.71333   |
| Radius ( $R_g$ ) =              | 272.84   | ±       | 3.3554    |
| Lorentzian Scale ( $I(0)_L$ ) = | 2470.4   | ±       | 90.923    |
| Correlation Length ( $a_l$ ) =  | 452.48   | ±       | 6.5172    |
| Bkgd ( $\text{cm}^{-1}$ ) =     | 0.058054 | ±       | 6.1822e-5 |
| Sqrt( $\chi^2/N$ ) =            | 2.7187   |         |           |
| Fitted Range =                  | 0.003433 | < $Q$ < | 0.4121    |

The fit follows the data closely, the error bars are small compared to their respective fitting parameter, and the  $\text{sqrt}(\chi^2/N)$  value is small, suggesting a good fit. Furthermore, the fractal dimension  $D$  parameter is also sufficiently close to the high  $Q$  slope determined from the Power Law fitting to suggest that these analyses do not contradict. The model is general enough to be able to apply to different types of gels while still describing the basic characteristics of the gel structure, thus reducing risk of overfitting the data. For these reasons, this model was chosen in conjunction with the Power Law analysis.

### Power Law Analysis of 0.06 w/v% G + 0.2 w/v% CBZ:

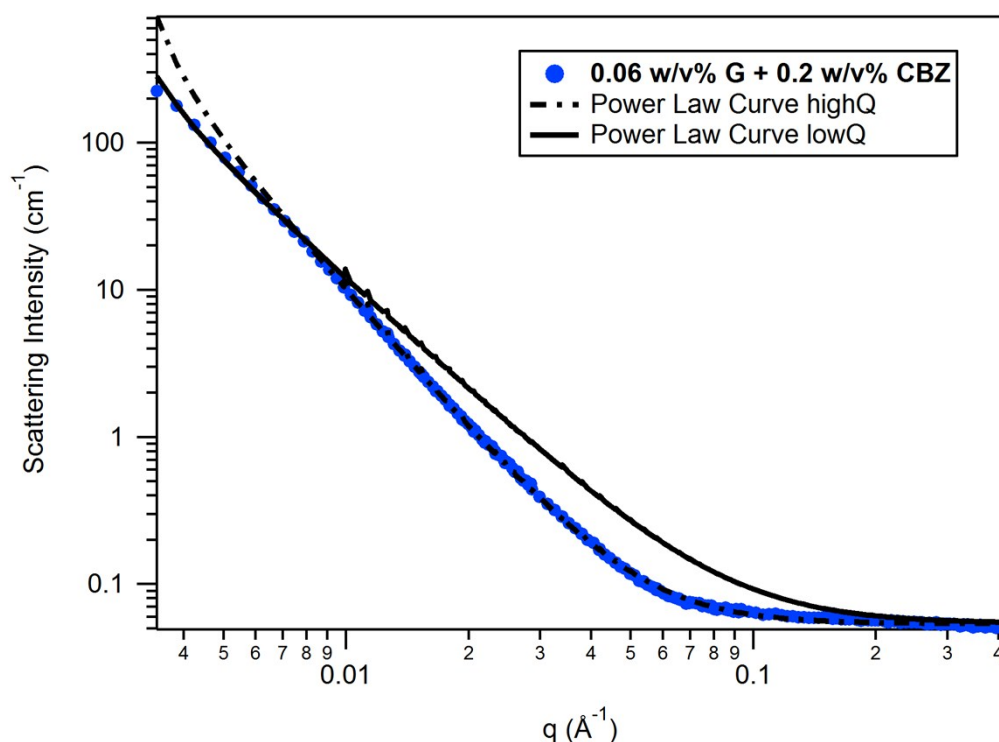

|                            | Low $Q$    |         |            | High $Q$   |         |            |
|----------------------------|------------|---------|------------|------------|---------|------------|
| Coefficient, A =           | 0.00012659 | $\pm$   | 5.72818e-6 | 6.43147e-6 | $\pm$   | 7.42172e-8 |
| (-)Power =                 | 2.47755    | $\pm$   | 0.00875341 | 3.08113    | $\pm$   | 0.00293039 |
| Bkgd (cm <sup>-1</sup> ) = | 0.0538353  | $\pm$   | 0          | 0.0538353  | $\pm$   | 6.04923e-5 |
| Fitted Range =             | 0.003433   | $< Q <$ | 0.006665   | 0.01353    | $< Q <$ | 0.4121     |

The Power Law model was used to determine the slopes (the (-)Power parameter) of the high and low  $Q$  regions, with the respective fitted ranges kept within the straight portions of the curve. Based on the error bars and how closely each fit follows the data over its fitted range, the fits are good. The background value for the low  $Q$  fit was held constant and equal to the background value obtained from the high  $Q$  fit to prevent overfitting.

### Gel Fit Model to 0.06 w/v% G + 0.2 w/v% CBZ:

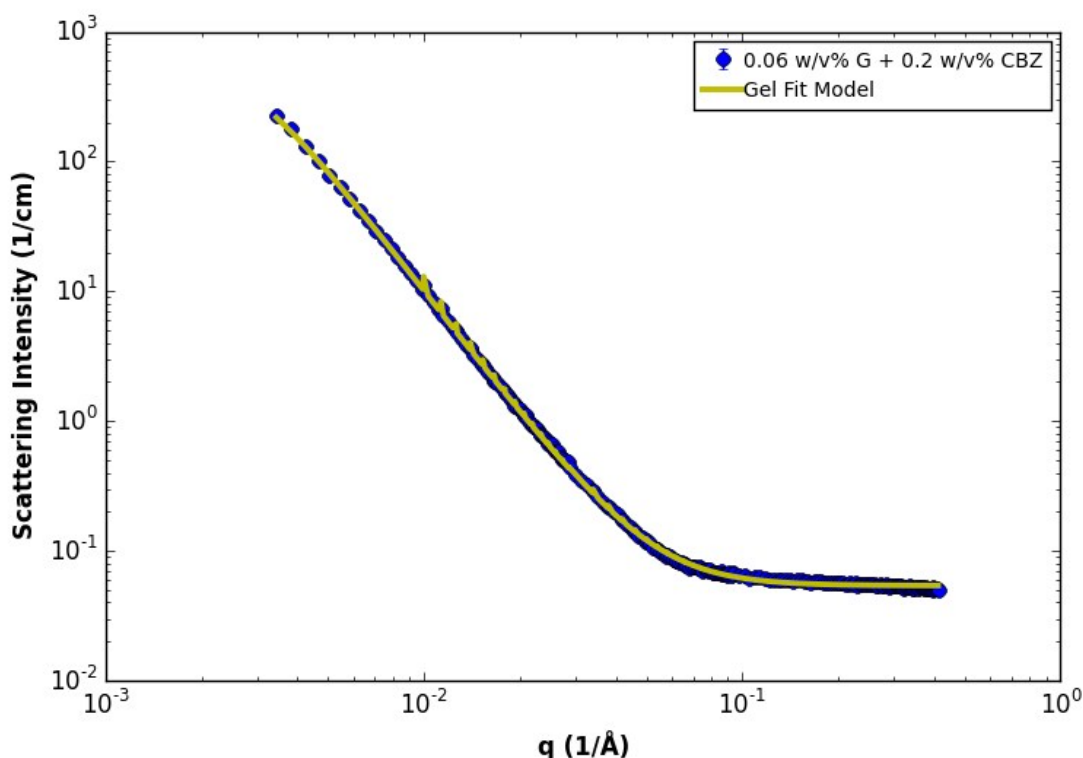

|                                 |          |         |           |
|---------------------------------|----------|---------|-----------|
| FractalExp ( $D$ ) =            | 3.1082   | ±       | 0.0041266 |
| Guinier Scale ( $I(0)_G$ ) =    | 3.6473   | ±       | 1.0602    |
| Radius ( $R_g$ ) =              | 313.3    | ±       | 20.617    |
| Lorentzian Scale ( $I(0)_L$ ) = | 1199.1   | ±       | 42.678    |
| Correlation Length ( $a_l$ ) =  | 403.3    | ±       | 5.6       |
| Bkgd ( $\text{cm}^{-1}$ ) =     | 0.053923 | ±       | 5.1408e-5 |
| Sqrt( $\chi^2/N$ ) =            | 3.1456   |         |           |
| Fitted Range =                  | 0.003433 | < $Q$ < | 0.4121    |

The fit follows the data closely, the error bars are small compared to their respective fitting parameter, and the  $\text{sqrt}(\chi^2/N)$  value is small, suggesting a good fit. Furthermore, the fractal dimension  $D$  parameter is also sufficiently close to the high  $Q$  slope determined from the Power Law fitting to suggest that these analyses do not contradict. The model is general enough to be able to apply to different types of gels while still describing the basic characteristics of the gel structure, thus reducing risk of overfitting the data. For these reasons, this model was chosen in conjunction with the Power Law analysis.
